# Supplementary figures and images for: Retinal neurons regulate proliferation of postnatal progenitors and Muller glia in the rat retina via TGFβ signaling
Source: Oxford University Press journal article supplement (doi:10.1242/dev.01882), 2005-06-08

A Nestin

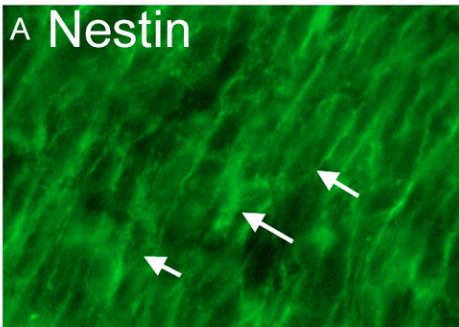

B Nestin

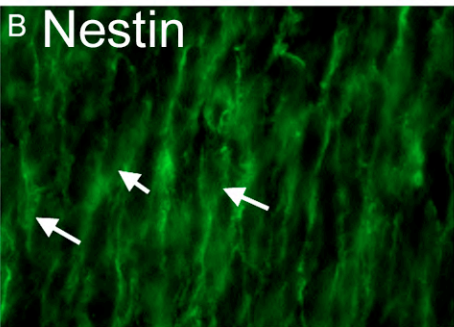

C Merge

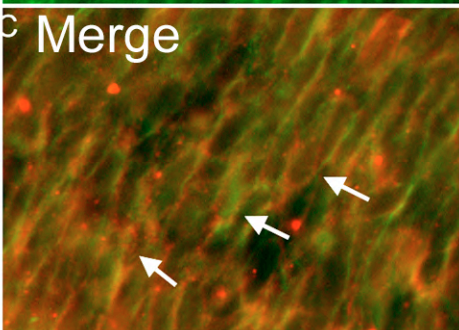

D Merge

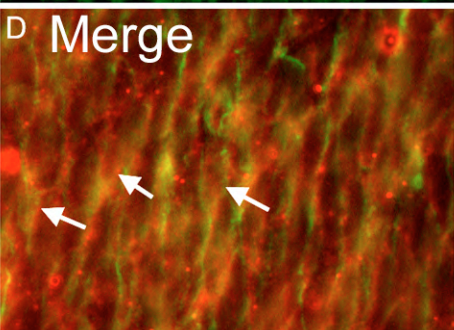

E RI

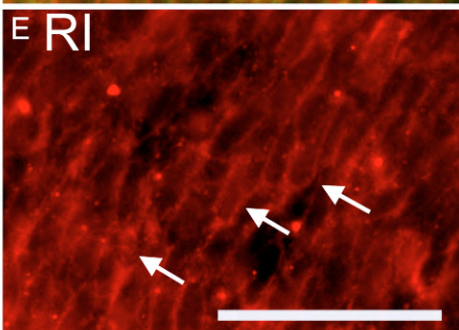

F RII

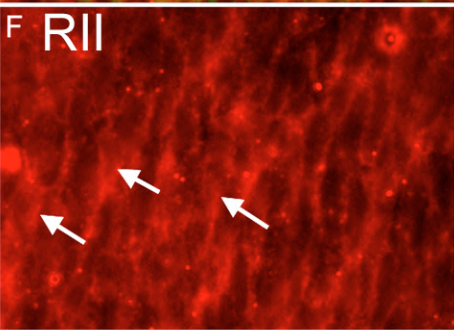

Supplement: dev01882-sup-figs1.pdf [file dev01882-sup-figs1.pdf]

# P4

# P6

Central

Peripheral

Central

Peripheral

Smad  
2/3

FoxO1

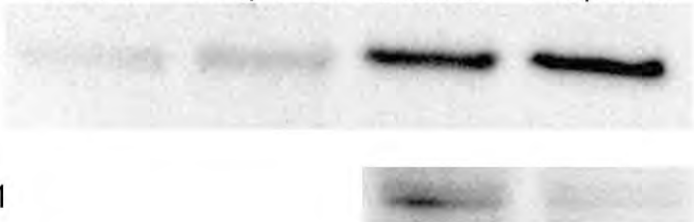

Supplement: dev01882-sup-figs2.pdf [file dev01882-sup-figs2.pdf]
